# Supplementary material for: Steps per Day and All-Cause Mortality in Middle-aged Adults in the Coronary Artery Risk Development in Young Adults Study
Source: JAMA Netw Open. 2021 Sep 3;4(9):e2124516. doi: 10.1001/jamanetworkopen.2021.24516 (PMC8417757; doi:10.1001/jamanetworkopen.2021.24516)
Supplement: Supplement. — eFigure 1. Flowchart of Sample Selection Among CARDIA Study Participants eFigure 2. Dose-Response Association of Steps per Day with Premature All-Cause Mortality by Race and by Sex eTable 1. Participant Characteristics at Year 20 Among Individuals Included vs Excluded Based on Accelerometer Wear eTable 2. Summary of Cause of Death for Total Sample and by Step Groups and Race and Sex Groups eTable 3. Hazard Ratios for the Association of All-Cause Mortality With Details of Parameters Included in Model eTable 4. Dose-Response Association of Steps per Day With Premature All-Cause Mortality Excluding Individuals Who Died in First 2 Years eTable 5. Extended Cox Regression Model Using Time Varying Covariates for the Dose-Response Association of Steps per Day With Premature All-Cause Mortality eTable 6. Dose-Response Association of Steps per Day With Premature All-Cause Mortality Among Subsample Sample With Diet Data Available [file jamanetwopen-e2124516-s001.pdf]

## Supplemental Online Content

Paluch AE, Gabriel KP, Fulton JE, et al. Steps per day and all-cause mortality in middle-aged adults in the Coronary Artery Risk Development in Young Adults Study. *JAMA Netw Open*. 2021;4(9):e2124516. doi:10.1001/jamanetworkopen.2021.24516

**eFigure 1.** Flowchart of Sample Selection Among CARDIA Study Participants

**eFigure 2.** Dose-Response Association of Steps per Day with Premature All-Cause Mortality by Race and by Sex

**eTable 1.** Participant Characteristics at Year 20 Among Individuals Included vs Excluded Based on Accelerometer Wear

**eTable 2.** Summary of Cause of Death for Total Sample and by Step Groups and Race and Sex Groups

**eTable 3.** Hazard Ratios for the Association of All-Cause Mortality With Details of Parameters Included in Model

**eTable 4.** Dose-Response Association of Steps per Day With Premature All-Cause Mortality Excluding Individuals Who Died in First 2 Years

**eTable 5.** Extended Cox Regression Model Using Time Varying Covariates for the Dose-Response Association of Steps per Day With Premature All-Cause Mortality

**eTable 6.** Dose-Response Association of Steps per Day With Premature All-Cause Mortality Among Subsample Sample With Diet Data Available

This supplemental material has been provided by the authors to give readers additional information about their work.

**eFigure 1.** Flowchart of Sample Selection Among CARDIA Study Participants

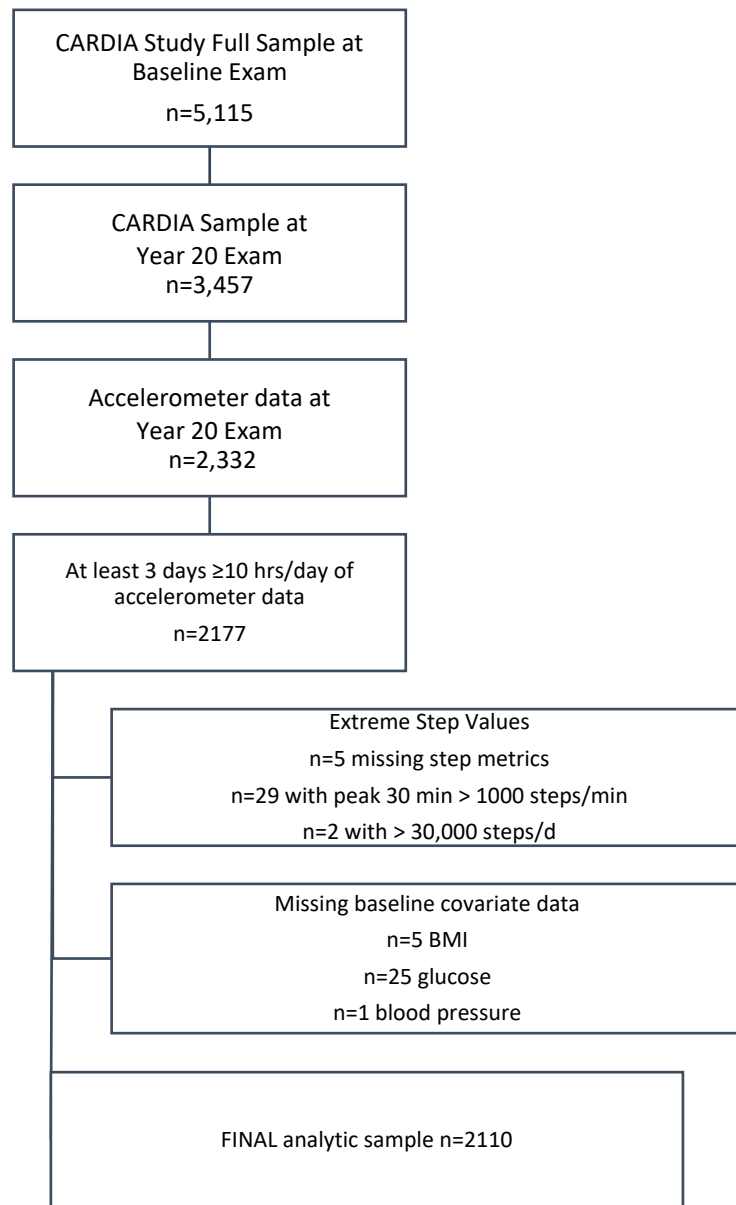

**eFigures 2.** Dose Response Association of Steps per Day with Premature All-Cause Mortality by Race and by Sex

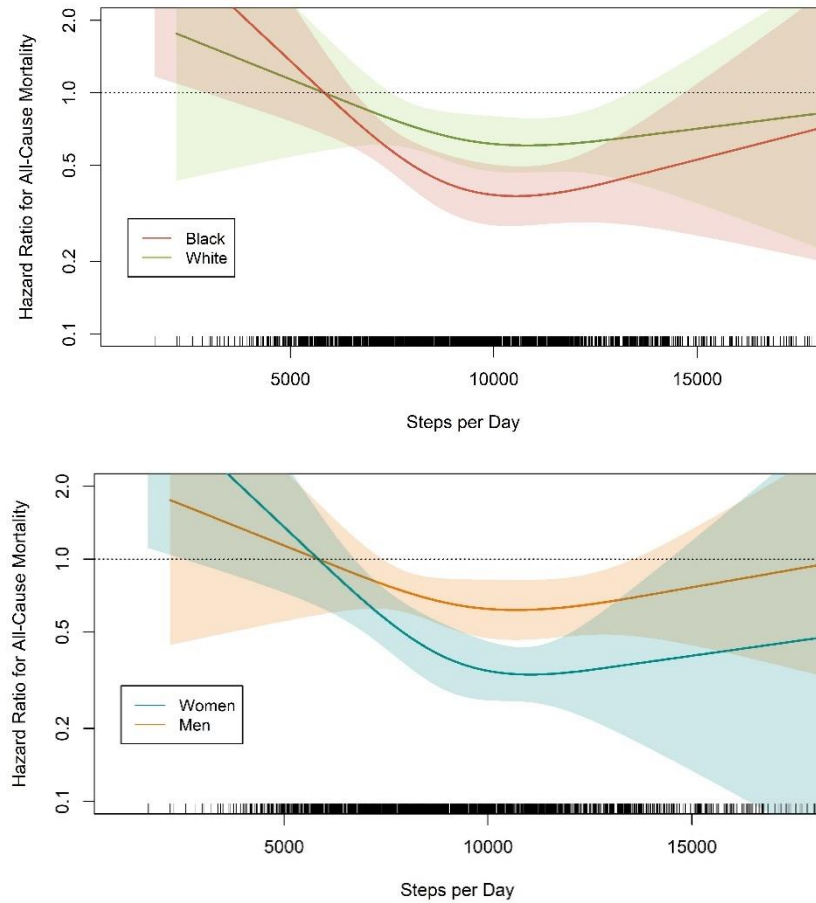

Restricted Cubic Splines of Hazard Ratios of steps/d with all-cause mortality. Knots set at 10<sup>th</sup>, 50<sup>th</sup>, and 90<sup>th</sup> percentile of steps/d. Reference set at 5800 steps/d (~median steps/d of low step group). Model is adjusted for age, accelerometer wear time, race (for sex models), sex (for race models), education, study center, BMI, smoking, alcohol, Systolic BP, Hypertension medication, Diabetes, Hyperlipidemia, History of CVD, Self-Rated Health. The y-axis is a log scale. Data are shown as hazard ratios and 95% confidence intervals.

**eTable 1.** Participant Characteristics at Year 20 Among Individuals Included vs Excluded Based on Accelerometer Wear

|                                                                                                                                                                                                                                                                                                                                     | <b>Included<br/>(n=2110)</b> | <b>Excluded<br/>(n=765)</b> |
|-------------------------------------------------------------------------------------------------------------------------------------------------------------------------------------------------------------------------------------------------------------------------------------------------------------------------------------|------------------------------|-----------------------------|
| <b>Baseline age, years</b>                                                                                                                                                                                                                                                                                                          | 45.2 (3.6)                   | 45.2 (3.6)                  |
| <b>Women, n (%)</b>                                                                                                                                                                                                                                                                                                                 | 1205 (57.1)                  | 430 (56.2)                  |
| <b>Black, n (%)*</b>                                                                                                                                                                                                                                                                                                                | 888 (42.1)                   | 401 (52.4)                  |
| <b>Education, years*</b>                                                                                                                                                                                                                                                                                                            | 15.6 (2.6)                   | 15.4 (2.7)                  |
| <b>Current Smoker, n (%)*</b>                                                                                                                                                                                                                                                                                                       | 356 (16.9)                   | 160 (20.9)                  |
| <b>Alcohol consumption, mL/day,<br/>median [IQR]</b>                                                                                                                                                                                                                                                                                | 2.4 [0, 14.5]                | 2.4 [0, 12.2]               |
| <b>Self-reported Physical Activity,<br/>Exercise Units*</b>                                                                                                                                                                                                                                                                         | 355 (274)                    | 310 (268)                   |
| <b>BMI, kg/m<sup>2</sup></b>                                                                                                                                                                                                                                                                                                        | 29.0 (7.0)                   | 29.3 (6.7)                  |
| <b>Systolic Blood Pressure, mmHg</b>                                                                                                                                                                                                                                                                                                | 115 (14)                     | 115 (15)                    |
| <b>Self-reported Health, poor/fair, n<br/>(%)*</b>                                                                                                                                                                                                                                                                                  | 195 (9.2)                    | 91 (11.9)                   |
| <b>Hyperlipidemia, n (%)</b>                                                                                                                                                                                                                                                                                                        | 1189 (56.4)                  | 461 (60.3)                  |
| <b>Diabetes, n (%)</b>                                                                                                                                                                                                                                                                                                              | 166 (7.9)                    | 60 (7.8)                    |
| <b>History of CVD, n (%)</b>                                                                                                                                                                                                                                                                                                        | 25 (1.2)                     | 14 (1.8)                    |
| <b>Deaths, n (%)</b>                                                                                                                                                                                                                                                                                                                | 72 (3.4)                     | 35 (4.5)                    |
| <p><b>* indicates significant differences p value &lt;0.05</b><br/> <b>Continuous variables reported as means (s.d.) unless noted</b><br/> <b>Excluded participants are considered those who did not wear the accelerometer or had less than 3 days of ≥10 hrs/d of accelerometer data recorded at the year 20 examination.</b></p> |                              |                             |

**eTable 2.** Summary of Cause of Death for Total Sample and by Step Groups and Race and Sex Groups

|                        | <b>Total Sample</b> | <b>By Steps/d Group</b>  |                                 |                         | <b>By Race-Sex Groups</b> |                        |                      |                      |
|------------------------|---------------------|--------------------------|---------------------------------|-------------------------|---------------------------|------------------------|----------------------|----------------------|
|                        |                     | <b>Low<br/>&lt;7,000</b> | <b>Mod<br/>7,000-<br/>9,999</b> | <b>High<br/>≥10,000</b> | <b>Black<br/>Women</b>    | <b>White<br/>Women</b> | <b>Black<br/>Men</b> | <b>White<br/>Men</b> |
| N                      | 2110                | 448                      | 863                             | 799                     | 556                       | 636                    | 313                  | 554                  |
| Total Deaths           | 72                  | 32                       | 16                              | 24                      | 20                        | 13                     | 19                   | 19                   |
| Cause of Death         |                     |                          |                                 |                         |                           |                        |                      |                      |
| Cardiovascular Disease | 17                  | 7                        | 5                               | 5                       | 4                         | 1                      | 5                    | 7                    |
| Cancer                 | 18                  | 9                        | 2                               | 7                       | 4                         | 8                      | 3                    | 3                    |
| Type 2 Diabetes        | 1                   | 1                        | 0                               | 0                       | 1                         | 0                      | 0                    | 0                    |
| Kidney Disease         | 1                   | 1                        | 0                               | 0                       | 1                         | 0                      | 0                    | 0                    |
| AIDS                   | 3                   | 1                        | 1                               | 1                       | 0                         | 0                      | 1                    | 2                    |
| Homicide               | 2                   | 1                        | 0                               | 1                       | 1                         | 0                      | 1                    | 0                    |
| Liver Disease          | 4                   | 2                        | 1                               | 1                       | 0                         | 1                      | 0                    | 2                    |
| Asthmas                | 2                   | 1                        | 1                               | 0                       | 1                         | 0                      | 1                    | 0                    |
| Other Lung Disease     | 3                   | 1                        | 1                               | 1                       | 1                         | 1                      | 1                    | 0                    |
| Suicide                | 2                   | 0                        | 0                               | 2                       | 0                         | 2                      | 0                    | 0                    |
| Unintentional Injury   | 5                   | 2                        | 3                               | 0                       | 0                         | 0                      | 1                    | 4                    |
| Sepsis                 | 5                   | 3                        | 0                               | 2                       | 1                         | 0                      | 3                    | 1                    |
| Other                  | 1                   | 0                        | 0                               | 1                       | 0                         | 0                      | 1                    | 0                    |
| Unknown                | 8                   | 3                        | 2                               | 3                       | 6                         | 0                      | 2                    | 0                    |

**eTable 3.** Hazard Ratios for the Association of All-Cause Mortality With Details of Parameters Included in Model

| Parameter                                                       | Model 2      |                         |       |         | Model 3      |                         |       |         |
|-----------------------------------------------------------------|--------------|-------------------------|-------|---------|--------------|-------------------------|-------|---------|
|                                                                 | Hazard Ratio | 95% Confidence Interval |       | P-value | Hazard Ratio | 95% Confidence Interval |       | P-value |
| Step group moderate (vs. low (ref))                             | 0.270        | 0.144                   | 0.508 | 0.001   | 0.285        | 0.150                   | 0.541 | 0.008   |
| Step group high (vs. low (ref))                                 | 0.402        | 0.225                   | 0.720 | 0.002   | 0.446        | 0.246                   | 0.809 | 0.001   |
| Age                                                             | 1.146        | 1.066                   | 1.232 | 0.001   | 1.136        | 1.056                   | 1.224 | 0.001   |
| Sex (Female vs Male(ref))                                       | 0.625        | 0.378                   | 1.032 | 0.066   | 0.594        | 0.353                   | 1.000 | 0.050   |
| Race (White vs Black (ref))                                     | 0.788        | 0.473                   | 1.313 | 0.360   | 0.781        | 0.455                   | 1.338 | 0.367   |
| Education                                                       | 0.894        | 0.809                   | 0.987 | 0.026   | 0.910        | 0.825                   | 1.004 | 0.060   |
| Field Center (Birmingham vs Oakland (ref))                      | 2.409        | 1.219                   | 4.764 | 0.011   | 2.436        | 1.230                   | 4.826 | 0.011   |
| Field Center (Chicago vs Oakland (ref))                         | 1.193        | 0.571                   | 2.492 | 0.638   | 1.203        | 0.572                   | 2.527 | 0.626   |
| Field Center (Minneapolis vs Oakland (ref))                     | 1.665        | 0.837                   | 3.312 | 0.146   | 1.557        | 0.775                   | 3.126 | 0.213   |
| Accelerometer wear time (min/d)                                 | 1.001        | 0.998                   | 1.004 | 0.434   | 1.001        | 0.998                   | 1.003 | 0.599   |
| BMI (kg/m <sup>2</sup> )                                        | 1.015        | 0.986                   | 1.045 | 0.302   | 1.011        | 0.980                   | 1.042 | 0.492   |
| Smoking Status (former vs never (ref))                          | 0.947        | 0.487                   | 1.842 | 0.872   | 0.950        | 0.487                   | 1.855 | 0.881   |
| Smoking Status (current vs never (ref))                         | 1.570        | 0.878                   | 2.807 | 0.128   | 1.432        | 0.785                   | 2.614 | 0.241   |
| Alcohol intake (none vs >12 ml/d (ref))                         | 0.856        | 0.478                   | 1.532 | 0.600   | 0.832        | 0.464                   | 1.491 | 0.535   |
| Alcohol intake (<12 ml/d vs >12 ml/d (ref))                     | 0.679        | 0.346                   | 1.331 | 0.259   | 0.649        | 0.330                   | 1.275 | 0.209   |
| Blood pressure medication (no vs yes (ref))                     |              |                         |       |         | 1.249        | 0.650                   | 2.402 | 0.504   |
| Diabetes (no vs. yes (ref))                                     |              |                         |       |         | 0.989        | 0.455                   | 2.150 | 0.978   |
| Hyperlipidemia (no vs. yes (ref))                               |              |                         |       |         | 1.370        | 0.822                   | 2.284 | 0.226   |
| History of CVD (no vs. year (ref))                              |              |                         |       |         | 0.304        | 0.110                   | 0.839 | 0.021   |
| Systolic Blood Pressure (mmHg)                                  |              |                         |       |         | 1.004        | 0.989                   | 1.019 | 0.573   |
| Self-Rated Health (poor/fair vs good/very good/excellent (ref)) |              |                         |       |         | 1.592        | 0.831                   | 3.052 | 0.161   |
| Likelihood Ratio Test <sup>a</sup>                              |              |                         |       |         |              |                         |       |         |
| Comparing to nested model 1                                     |              |                         |       | 0.001   |              |                         |       | 0.002   |
| Comparing to nested model 2                                     |              |                         |       | -       |              |                         |       | 0.261   |

<sup>a</sup>Likelihood ratio test for nested model comparison. P-values calculated using a chi-squared test for nested vs full model. Model 1adjusted for age, sex, race, accelerometer wear time.

**eTable 4.** Dose-Response Association of Steps per Day With Premature All-Cause Mortality Excluding Individuals Who Died in First 2 Years

|                                                                                                                                                                                                                                                            | No. | Events | Model 1<br>HR (95% CI) | Model 3<br>HR (95% CI) |
|------------------------------------------------------------------------------------------------------------------------------------------------------------------------------------------------------------------------------------------------------------|-----|--------|------------------------|------------------------|
| <7,000 steps/d                                                                                                                                                                                                                                             | 447 | 31     | 1.00 (ref)             | 1.00 (ref)             |
| 7,000-9,999 steps/d                                                                                                                                                                                                                                        | 862 | 15     | 0.22 (0.12 - 0.42)     | 0.27 (0.14 - 0.52)     |
| ≥10,000 steps/d                                                                                                                                                                                                                                            | 798 | 23     | 0.37 (0.21 - 0.63)     | 0.42 (0.23 - 0.76)     |
| p-value for trend                                                                                                                                                                                                                                          |     |        | <0.01                  | <0.01                  |
| <b>Model 1: Adjust models for age, sex, race, accelerometer wear time</b><br><b>Model 3: Model 1 + education, center, BMI, smoking, alcohol intake, systolic blood pressure, Hypertension medication, Diabetes, Hyperlipidemia, CVD, Self-rated Health</b> |     |        |                        |                        |

**eTable 5.** Extended Cox Regression Model Using Time Varying Covariates for the Dose-Response Association of Steps per Day With Premature All-Cause Mortality

|                                                                                                                                                                                                                                                                                                                                                           | <b>No.</b> | <b>Events</b> | <b>HR (95% CI)<br/>adjusting for time-<br/>updated covariates</b> |
|-----------------------------------------------------------------------------------------------------------------------------------------------------------------------------------------------------------------------------------------------------------------------------------------------------------------------------------------------------------|------------|---------------|-------------------------------------------------------------------|
| <b>&lt;7,000 steps/d</b>                                                                                                                                                                                                                                                                                                                                  | 448        | 32            | 1.00 (ref)                                                        |
| <b>7,000-9,999 steps/d</b>                                                                                                                                                                                                                                                                                                                                | 863        | 16            | 0.28 (0.15 - 0.54)                                                |
| <b>≥10,000 steps/d</b>                                                                                                                                                                                                                                                                                                                                    | 779        | 24            | 0.44 (0.25 - 0.80)                                                |
| <b>p-value for trend</b>                                                                                                                                                                                                                                                                                                                                  |            |               | 0.01                                                              |
| <b>Models adjusted for baseline variables of age, sex, race, accelerometer wear time, education, center, and time-varying variables of BMI, smoking, alcohol, systolic blood pressure, Hypertension medication, Diabetes, Hyperlipidemia, CVD, Self-Rated Health. Time-varying variables were measured at year 20, year 25, and year 30 examinations.</b> |            |               |                                                                   |

**eTable 6.** Dose-Response Association of Steps per Day With Premature All-Cause Mortality Among Subsample Sample With Diet Data Available

|                                                                                                                                              | <b>n Events/n Total</b> | <b>Healthy Eating Index Included in Model<br/>HR (95% CI)</b> | <b>Healthy Eating Index Not Included in Model<br/>HR (95% CI)</b> |
|----------------------------------------------------------------------------------------------------------------------------------------------|-------------------------|---------------------------------------------------------------|-------------------------------------------------------------------|
| <b>&lt;7,000 steps/day</b>                                                                                                                   | 32/447                  | 1.00 (ref)                                                    | 1.00 (ref)                                                        |
| <b>7,000-9,999 Steps/day</b>                                                                                                                 | 13/862                  | 0.22 (0.11 - 0.43)                                            | 0.22 (0.11 - 0.43)                                                |
| <b>≥10,000 Steps</b>                                                                                                                         | 18/798                  | 0.29 (0.15 - 0.54)                                            | 0.29 (0.15 - 0.54)                                                |
| <b>p-value for trend</b>                                                                                                                     |                         | <0.01                                                         | <0.01                                                             |
| <b>Models adjusted for age, sex, race, accelerometer wear time, education, center, BMI, smoking, alcohol (with or without diet variable)</b> |                         |                                                               |                                                                   |
